# Supplementary figures and images for: Gel properties of Amur sturgeon (Acipenser schrenckii) surimi improved by lecithin at reduced and regular-salt concentrations
Source: Royal Society of Chemistry journal article supplement (doi:10.1039/d0ra04487c), 2020-01-01

S. Fig. 1

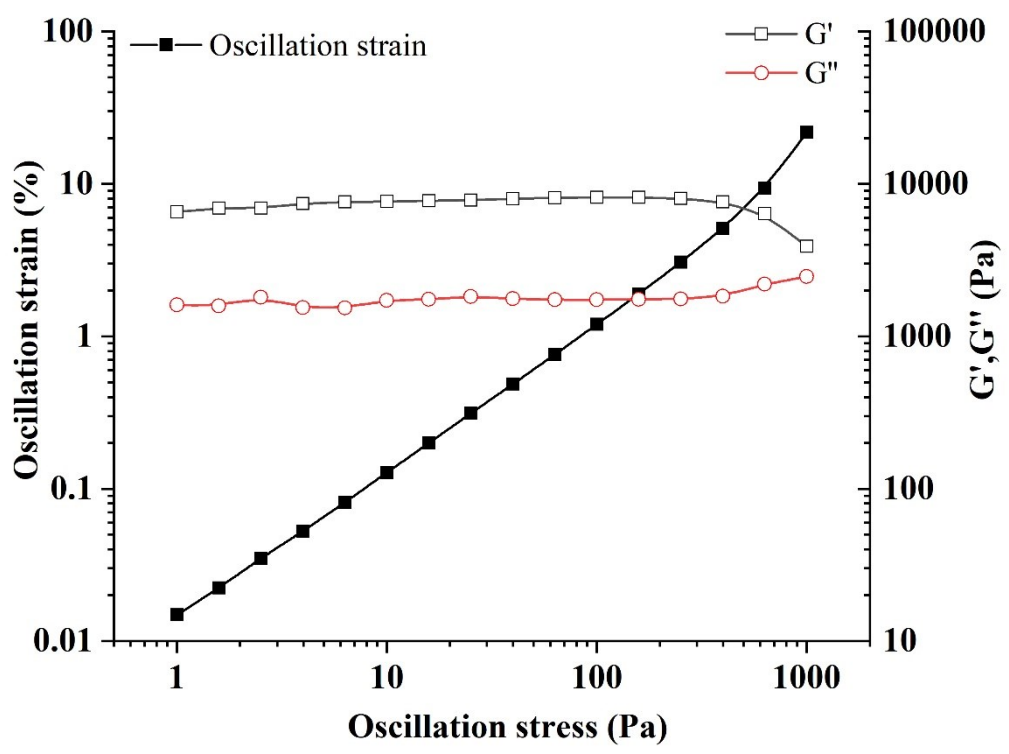

Supplement: d0ra04487c1.pdf [file d0ra04487c1.pdf]
